1 **Selective carbon sources influence the end-products of microbial nitrate respiration**

2

3 Hans K. Carlson<sup>1,\*</sup>, Lauren M. Lui<sup>1</sup>, Morgan N. Price<sup>1</sup>, Alexey E. Kazakov<sup>1</sup>, Alex V. Carr<sup>1</sup>,  
4 Jennifer V. Kuehl<sup>1</sup>, Trenton K. Owens<sup>1</sup>, Torben Nielsen<sup>2</sup>, Adam P. Arkin<sup>1,3</sup>, Adam M.  
5 Deutschbauer<sup>1,4,\*</sup>

6

7 Addresses: <sup>1</sup>Environmental Genomics and Systems Biology Division, Lawrence Berkeley National  
8 Laboratory, Berkeley, CA 94720, USA; <sup>2</sup>Joint Genome Institute, Lawrence Berkeley National  
9 Laboratory, Berkeley, CA 94720, USA; <sup>3</sup>Department of Bioengineering, University of California,  
10 Berkeley, CA 94720, USA; <sup>4</sup>Department of Plant and Microbial Biology, University of California,  
11 Berkeley, CA 94720, USA

12

13 \* To whom correspondence should be addressed:

14 Hans K. Carlson: [HKCarlson@lbl.gov](mailto:HKCarlson@lbl.gov)

15 Adam M. Deutschbauer: [AMDeutschbauer@lbl.gov](mailto:AMDeutschbauer@lbl.gov)

16 **Subject category:** Microbial Population and Community Ecology

17 **Conflict of interest:** The authors declare no conflict of interest.

18 **Grant information:** This work was funded by ENIGMA, a Scientific Focus Area Program  
19 supported by the U. S. Department of Energy, Office of Science, Office of Biological and  
20 Environmental Research, Genomics: GTL Foundational Science through contract DE-AC02-  
21 05CH11231 between Lawrence Berkeley National Laboratory and the U. S. Department of  
22 Energy.

## 23 **Abstract**

24           Respiratory and catabolic pathways are differentially distributed in microbial genomes.  
25 Thus, specific carbon sources may favor different respiratory processes. We profiled the influence  
26 of 94 carbon sources on the end-products of nitrate respiration in microbial enrichment cultures  
27 from diverse terrestrial environments. We found that some carbon sources consistently favor  
28 dissimilatory nitrate reduction to ammonium (DNRA/nitrate ammonification) while other carbon  
29 sources favor nitrite accumulation or denitrification. For an enrichment culture from aquatic  
30 sediment, we sequenced the genomes of the most abundant strains, matched these genomes to 16S  
31 rDNA exact sequence variants (ESVs), and used 16S rDNA amplicon sequencing to track the  
32 differential enrichment of functionally distinct ESVs on different carbon sources. We found that  
33 changes in the abundances of strains with different genetic potentials for nitrite accumulation,  
34 DNRA or denitrification were correlated with the nitrite or ammonium concentrations in the  
35 enrichment cultures recovered on different carbon sources. Specifically, we found that either L-  
36 sorbose or D-cellobiose enriched for a *Klebsiella* nitrite accumulator, other sugars enriched for an  
37 *Escherichia* nitrate ammonifier, and citrate or formate enriched for a *Pseudomonas* denitrifier and  
38 a *Sulfurospirillum* nitrate ammonifier. Our results add important nuance to the current paradigm  
39 that higher concentrations of carbon will always favor DNRA over denitrification or nitrite  
40 accumulation, and we propose that, in some cases, carbon composition can be as important as  
41 carbon concentration in determining nitrate respiratory end-products. Furthermore, our approach  
42 can be extended to other environments and metabolisms to characterize how selective parameters  
43 influence microbial community composition, gene content and function.

44

## 45 **Introduction**

46           The nitrogen cycle is the most anthropogenically perturbed element cycle(1). The world's  
47 population relies on nitrogen fertilizer to maintain productive agricultural ecosystems. However,  
48 nitrogen contamination of surface waters and groundwater has serious consequences for public  
49 and environmental health. Thus, we need a predictive understanding of how varying  
50 biogeochemical conditions influence the fate of nitrogen in the environment. Such a framework  
51 would enable better monitoring and managing of microbial communities to mitigate environmental  
52 damage while maximizing the productivity of agricultural lands(2).

53           Heterotrophic nitrate respiration is a critical juncture in the nitrogen and carbon cycles.  
54 Denitrification converts nitrate into dinitrogen, thereby returning biologically or industrially fixed  
55 nitrogen to the atmosphere. Dissimilatory nitrate reduction to ammonium (DNRA, nitrate  
56 ammonification) converts nitrate into ammonium, thereby maintaining nitrogen in terrestrial  
57 reservoirs. Most studies agree about the importance of electron donor excess or limitation in  
58 controlling the competition between DNRA and denitrification(3-11). There are some examples  
59 of different electron donors (e.g. carbon sources) determining the end-products of nitrate  
60 respiration(5, 8-10), but less is known about the mechanistic basis for these observations. While  
61 thermodynamic calculations predict that higher concentrations of electron donor will favor DNRA  
62 over denitrification(7), the specific carbon source available to drive DNRA must be utilized by the  
63 DNRA sub-populations in the system. Nitrate respiratory pathway enzymes are differentially  
64 distributed across phylogenetic boundaries(12) as are carbon catabolic pathways (13, 14). Thus,  
65 we postulate that certain, selective carbon sources are more likely to drive microbial nitrate  
66 respiration towards specific end-products such as dinitrogen ( $N_2$ ), ammonium ( $NH_4^+$ ) or

67 intermediate nitrogen oxides (NO<sub>2</sub><sup>-</sup>, NO, N<sub>2</sub>O), especially in systems with less complex microbial  
68 communities.

69 Carbon amendments are often used to perturb microbiomes to alter community  
70 composition and functional outcomes(9, 15-20). Usually, however, carbon sources are chosen  
71 based on general physiological hypotheses (e.g. acetate as a non-fermentable carbon source to  
72 stimulate metal reduction(18), poly-L-lactate as a hydrogen releasing compound to stimulate  
73 reductive dehalogenation(20)), and rarely are carbon sources systematically compared to identify  
74 the optimal carbon source to favor a given function. Some studies suggest that different carbon  
75 sources will enrich for microbial sub-populations with distinct carbon catabolic preferences (21-  
76 24), but the mechanisms and functional consequences of these changes in microbiome composition  
77 on key ecosystem services remain largely uncharacterized. While advances in high-throughput  
78 genetics are leading to more rapid discovery of genes involved in carbon catabolic pathways(25),  
79 our current ability to predict carbon preferences based on taxonomy remains poor, particularly  
80 when catabolic preferences vary for closely related taxa(13, 14). Additionally—even with data on  
81 the genetic potential of microbial sub-populations from genome sequencing—inaccurate gene  
82 annotations, complex gene regulation, ecological dynamics and environment-specific  
83 physiological and metabolic responses make taxonomy-based or genome-based predictions of  
84 community composition and functional traits difficult. To bridge this knowledge gap, there is a  
85 need for high-throughput methods to rapidly measure the influence of selective pressures on  
86 microbial community composition, gene content and function across diverse conditions in the  
87 laboratory(26).

88 High-throughput colorimetric assays to measure microbial activity can be combined with  
89 16S rDNA amplicon sequencing of enrichment cultures to understand how changes in community

90 composition influences metabolic traits (Figure 1A)(26-29). By determining the gene content of  
91 each strain represented by a 16S rDNA exact sequence variant (ESV) in a microbial community  
92 using genome-resolved metagenomics and isolate genome sequencing, we can track changes in  
93 gene content in high-throughput using 16S rDNA amplicons (Figure 1B). Thus, we can measure  
94 correlations between growth conditions, strain abundances, functional gene abundances, and  
95 functional traits (Figure 1) to understand how selective growth conditions influence the functional  
96 ecology of a microbial community.

97         In this study, we characterized the influence of 94 different carbon sources on nitrate-  
98 respiring microbial communities. We used colorimetric assays to quantify nitrite and ammonium  
99 concentrations, and we identified carbon sources that favor different end-products of nitrate  
100 respiration across microbial communities from diverse environments. We then focused on a  
101 microbial community enriched from aquatic sediment. We recovered this enrichment culture on  
102 different carbon sources and observed correlations between high nitrite or ammonium  
103 concentrations and high relative abundance of specific strains with the genetic potential to produce  
104 these end-products. We found that D-glucose favors ammonium production and the growth of an  
105 *Escherichia* community member with the genetic potential for DNRA, but L-sorbose favors nitrite  
106 accumulation and selects for a *Klebsiella* nitrite accumulator. In contrast, citrate or formate enrich  
107 for a *Pseudomonas* denitrifier and a *Sulfurospirillum* nitrate ammonifier. Isolation and  
108 characterization of strains from the enrichments confirms the catabolic and respiratory traits  
109 predicted from sequencing the genomes of strains in the community. Finally, comparative  
110 genomic analyses suggest that our findings with L-sorbose may be a likely outcome across other  
111 environments. Taken together, our results indicate that alongside carbon concentration, carbon  
112 composition influences the end-products of nitrate respiration by enriching for sub-populations

113 with distinct respiratory traits. This approach to linking selective carbon sources to changes in the  
114 composition and gene content of a nitrate-respiring microbial community can be extended to other  
115 systems and microbiomes to characterize of how carbon sources and other selective pressures  
116 influence the functional ecology of this, and other, globally important metabolic processes.

117

## 118 **Materials and Methods**

### 119 **Media and cultivation conditions**

120 Samples for primary enrichments were sediment collected from Jewel Lake in Tilden  
121 Regional Park (37°54'45.2"N 122°16'09.1"W), soil from the Russell Ranch Field Site  
122 (38°32'38.8"N 121°52'12.4"W), or groundwater from the Oak Ridge Field Research Center  
123 (35°56'27.8484"N 84°20'10.2516"W). Primary microbial enrichment cultures were prepared by  
124 mixing sediment or soil (~10 grams) or groundwater (5 mL) with anoxic chemically defined basal  
125 medium supplemented with 2 g/L yeast extract (Becton Dickinson and Company, Franklin Lakes,  
126 NJ, USA) as the sole organic carbon source and electron donor and 20 mM sodium nitrate as the  
127 sole terminal electron acceptor and incubated for 48 hours at 30 °C. All chemicals are from Sigma-  
128 Aldrich (St Louis, Mo, USA). Basal medium contained per liter: 1 g sodium chloride, 0.25 g  
129 ammonium chloride (4.67 mM), 1 g sodium phosphate, 0.1 g potassium chloride and 30 mM  
130 HEPES buffer with vitamins and minerals added from 100x stock solutions. Vitamin stock  
131 solution contained per liter: 10 mg pyridoxine HCl, 5 mg 4-aminobenzoic acid, 5 mg lipoic acid,  
132 5 mg nicotinic acid, 5 mg riboflavin, 5 mg thiamine HCl, 5 mg calcium D,L-pantothenate, 2 mg  
133 biotin, 2 mg folic acid, 0.1 mg cyanocobalamin. Mineral stock solution contained per liter: 3 g  
134 magnesium sulfate heptahydrate, 1.5 g nitrilotriacetic acid, 1 g sodium chloride, 0.5291 g  
135 manganese(II) chloride tetrahydrate, 0.05458 g cobalt chloride, 0.1 g zinc sulfate heptahydrate,

136 0.1 g calcium chloride dihydrate, 0.07153 g iron(II) chloride tetrahydrate, 0.02765 g nickel(II)  
137 sulfate hexahydrate, 0.02 g aluminum potassium sulfate dodecahydrate, 0.00683 g copper(II)  
138 chloride dihydrate, 0.01 g boric acid, 0.01 g sodium molybdate dihydrate, 0.000197 g sodium  
139 selenite pentahydrate. Enrichments were passaged twice by ten-fold dilution into fresh basal  
140 medium and cryopreserved in multiple aliquots in basal medium with nitrate but without yeast  
141 extract and containing 25% glycerol.

142 To measure the influence of carbon sources on the end-products of the archived nitrate  
143 reducing microbial communities, cryo-preserved enrichments were recovered in anoxic  
144 chemically defined basal medium amended with 2g/L yeast extract and 20 mM sodium nitrate.  
145 Cells from recovered enrichment cultures were pelleted at 4000 RCF and washed three times with  
146 2x concentrated basal medium lacking a carbon source. Washed cells were resuspended in 2x  
147 concentrated basal medium lacking a carbon source to an optical density (OD 600) of 0.04 and the  
148 cell suspension was transferred into either 384 well microplates (Costar, Thermo Fisher Scientific,  
149 Waltham, MA, USA) or 96 deep-well blocks (Costar) in which 94 carbon sources and water  
150 controls were arrayed (Table S1). Carbon source stock solutions were added to microplates using  
151 a Biomek FXP liquid handling robot (Beckman Coulter, Indianapolis, IN, USA) and kept in an  
152 anaerobic chamber (Coy, Grass Lake, MI, USA) for 48 hours to become anoxic prior to inoculation  
153 using a Rainin Liquidator 96 pipettor (Mettler-Toledo, Oakland, CA, USA). Inoculated  
154 microplates were sealed with silicon microplate seals (VWR) and incubated at 30 °C in an  
155 incubator in an anaerobic chamber (Coy). Growth was monitored by optical density (OD 600)  
156 using a Tecan M1000 Pro microplate reader (Tecan Group Ltd., Männendorf, Switzerland) and  
157 cultures were harvested at 48 hours for DNA sequencing and colorimetric assays to measure  
158 nitrogen cycle metabolic intermediates.

159 **Isolation of bacterial strains**

160 To obtain pure culture isolates, liquid enrichments were recovered in anoxic basal medium  
161 containing 20 mM sodium nitrate and amended with carbon sources in which target strains were  
162 enriched. Liquid cultures were then plated onto anoxic solid agar containing the same media.  
163 Colonies were picked into either basal medium or R2A medium and recovered either aerobically  
164 or anaerobically with 20mM sodium nitrate as the sole terminal electron acceptor. Isolates were  
165 cryo-preserved in 25% glycerol and DNA was extracted for genome sequencing and 16S rDNA  
166 Sanger sequencing.

167 **Colorimetric assays and analysis**

168 Nitrite and ammonium concentrations were determined using established colorimetric  
169 assays<sup>(30)</sup>. Microplate seals were removed from 384-well microplates containing enrichment  
170 cultures and a Biomek FxP (Beckman Coulter) was used to transfer small volumes of culture to  
171 assay microplates pre-filled with small volumes of ultrapure water. For nitrite measurements, 2  
172  $\mu\text{L}$  of culture in 20  $\mu\text{L}$  of water was prepared in assay plates. 20  $\mu\text{L}$  Griess reagent was added to  
173 assay plates which were then kept at 30 °C for 30 minutes prior to reading absorbance at 548 nm  
174 (Tecan M1000 Pro). Griess reagent contains 0.2% w/v naphthylethylenediamine dihydrochloride,  
175 2% w/v sulfanilamide and 5% phosphoric acid. For ammonium measurements, 4  $\mu\text{L}$  of culture  
176 diluted in 20  $\mu\text{L}$  of distilled deionized water was prepared in assay plates. In sequential order, 4  
177  $\mu\text{L}$  of citrate reagent, 8  $\mu\text{L}$  of salicylate/nitroprusside reagent and 4  $\mu\text{L}$  bleach reagent were added  
178 to assay plates which were then kept at 30 °C for 30 minutes. Citrate reagent contains 10 g  
179 trisodium citrate and 4 g sodium hydroxide in 200 mL water. Salicylate/nitroprusside reagent  
180 contains 15.626 g sodium salicylate and 0.250 g sodium nitroprusside in 200 mL water at pH 6-7.  
181 Bleach reagent contains 1g sodium phosphate monobasic, 2 mL 2M sodium hydroxide, 10 mL



182 bleach (0.7 M NaOCl, Chlorox Company, Pleasanton, CA, USA) in 100 mL water at pH 12-13.  
183 All reagents were prepared the same day as assays and standard curves with sodium nitrite and  
184 ammonium chloride were used to calculate nitrite and ammonium concentrations. For pH  
185 measurements, 100  $\mu$ M resazurin was mixed 1:1 with cultures and absorbance was measured at  
186 590 nM. A standard curve was prepared in sterile media with different buffer salts to cover the  
187 pH range from 3 to 11 as reported previously(31). For all colorimetric assays, we also confirmed  
188 that interference of all 94 carbon sources was negligible. Using constants obtained from the  
189 BioNumbers database(32), we estimated the quantity of nitrogen assimilated into biomass by  
190 assuming 0.3 g/L of dry weight of bacterial culture at OD 600 = 1 (BNID 109835, BNID 109836)  
191 (33, 34), and by assuming 12% nitrogen by weight in microbial biomass based on measured C:N:P  
192 ratios(35, 36).

### 193 **16S rDNA amplicon sequencing and analysis**

194 DNA extraction, library prep and Illumina sequencing were performed as reported  
195 previously(37). Briefly, microbial cells from 500  $\mu$ L cultures were pelleted by centrifugation at  
196 4000 RCF after 48 hours of growth at 30°C. Genomic DNA extractions were performed using  
197 the QIAamp 96 DNA QIAcube HT Kit (Qiagen, Redwood City, CA, USA) with minor  
198 modifications including an enzymatic lysis pre-treatment step and the use of a vacuum manifold  
199 to perform column purification steps.

200 Following gDNA extraction, gDNA concentrations were quantified using the Quant-iT  
201 dsDNA High-Sensitivity kit (Thermo Fisher Scientific, Waltham, MA, USA) and normalized to  
202 approximately 3 ng/ $\mu$ l. PCR amplification of the V3–V4 region of the 16S rDNA gene was  
203 performed with Phusion High-Fidelity DNA Polymerase (New England Biolabs, Ipswich, MA,  
204 USA) for 25 cycles using 0.05 M of each primer as described previously(37). PCR amplicons

205 were pooled by plate (96 conditions), purified (Zymo Research, Irvine, CA, USA), and quantified  
206 using the Quant-iT dsDNA High-Sensitivity kit (Thermo Fisher). The samples were normalized to  
207 the lowest sample concentration and then combined in equal proportions to generate the library.  
208 The library was quantified prior to loading using quantitative real-time PCR (KAPA Biosystems,  
209 Wilmington, MA, USA) on a CFX96 real-time PCR detection system (Bio-Rad, Hercules, CA,  
210 USA). Following amplification, the library was diluted to 4.5 nM and loaded on the Illumina  
211 MiSeq platform for 2 x 300 bp paired-end sequencing.

212 To obtain exact sequence variants (ESVs) from the 16S amplicon sequencing data, we used  
213 QIIME2 v2018.2. Primers were trimmed from Illumina reads using custom scripts prior to  
214 QIIME2 processing. Reads were discarded if primers were not detected or did not have a matching  
215 paired read. The DADA2 pipeline was used to identify ESVs and to create a relative abundance  
216 table with 280 for the --p-trunc-len-f and --p-trunc-len-r parameters for read quality trimming. We  
217 focused on ESVs that were present at >5% in any sample. The fold-enrichment of each strain on  
218 each carbon source relative to the primary enrichment inoculum is reported in Table S3.  
219 *Sulfurospirillum* was below detection in the inoculum and we calculated a lower limit for the fold  
220 enrichment of this strain based on the observation that the lowest abundance ESVs in our samples  
221 were observed at ~0.01%.

## 222 **Genome and Metagenome sequencing and analysis**

223 For isolates, we prepared sequencing libraries using the KAPA HyperPrep kit (Roche,  
224 Basal, Switzerland) and sequenced on the Illumina HiSeq2500 (Illumina, San Diego, CA, USA).  
225 Genomes were assembled using Unicycler(38). Cultures used for metagenome sequencing were  
226 grown on citrate, formate, L-arginine, pyruvate, lactate and yeast extract, sequenced separately  
227 and reads were combined for a co-assembly. gDNA was prepped for metagenomics sequencing

228 using the Nexterra Flex kit (Illumina) and sequenced on the Illumina HiSeq2500 with 2x150  
229 paired-end reads. Metagenome reads were assembled using SPAdes v3.13.0(39). Protein-coding  
230 genes were predicted using PRODIGAL and RNA genes using INFERNAL v1.1. Assembled  
231 contigs were binned using MetaBat2(40). 16S rDNA exact sequence variants (ESVs) from  
232 amplicon sequencing of enrichment cultures were searched against microbial isolate genomes to  
233 identify exact matches. The taxonomy of the metagenome assembled genomes (MAGs) for  
234 *Sulfurospirillum*, *Clostridium* and *Peptostreptococcae* was determined based on the GTDB-Tk(41)  
235 taxonomy and matched to the 16S rDNA ESVs with the closest taxonomy from SILVA(42) and  
236 highest coverage. All bins used for functional assignments of strains were >69% complete as  
237 assessed by CheckM(43) (Table S4).

238 Genes involved in nitrogen cycling were identified by comparison with a manually curated  
239 database of marker proteins for nitrogen cycle processes. To construct the database, nitrogen cycle-  
240 related genes were collected from SEED ("Denitrification", "Dissimilatory nitrite reductase",  
241 "Nitrate and nitrite ammonification" subsystems) (44) and KEGG ORTHOLOGY (M00175,  
242 M00528, M00529, M00530, M00531, M00804 modules) (45) databases. Additional nitrogen  
243 cycle enzymes were identified by CD-HIT (46) clustering of the annotated nitrogen cycle enzymes  
244 with proteins from 11384 genomes from SEED database at 80% sequence identity threshold.

245 MAG genes related to nitrogen cycle enzymes were identified by DIAMOND(47) search  
246 (e-value threshold  $10^{-5}$ , minimum 50% identity) against the marker proteins database. To remove  
247 spurious homologs, all candidate genes were used in a second DIAMOND search (e-value  
248 threshold  $10^{-4}$ ) against proteins from 11384 SEED genomes, not related to nitrogen cycle genes.  
249 Genes having higher bit-score in the second search were discarded as false-positives.

250 **Co-occurrence of L-sorbose utilization genes with nitrate reduction genes**

251 We used Annotree(48) to search 28,941 prokaryotic genomes from GTDB-Tk(41) for  
252 KEGG orthologs of genes involved in L-sorbose utilization(49) (*sorABE*: KO2814, KO2813,  
253 K19956), respiratory nitrate reduction (*narG*: KO00370, *napA*: KO2567) and respiratory nitrite  
254 reduction (*nirS*: K15864, *nirK*: KO0368, *nrfA*: KO3385). We used default settings on Annotree  
255 (minimum 30% amino acid identity between subject and a gene assigned to that ortholog group by  
256 KEGG).

## 257 **Results**

### 258 **Selective carbon sources influence the end-products of nitrate respiration in microbial** 259 **enrichment cultures**

260 We enriched for nitrate-respiring microbial communities by inoculating anoxic basal  
261 growth medium with 20 mM sodium nitrate as the sole terminal electron acceptor and 2g/L yeast  
262 extract as the sole carbon source and electron donor with aquatic sediment from Jewel Lake in  
263 Tilden Regional Park in Berkeley, CA, agricultural soil from Russell Ranch in Davis, CA and  
264 groundwater from the Oak Ridge Field Research Center in Oak Ridge, TN (ORFRC). We  
265 minimized passaging of the enrichments in an effort to preserve as diverse a community as  
266 possible. Each enrichment was cryopreserved, recovered in media with yeast extract, washed,  
267 and subsequently cultured in the presence of 94 different carbon sources. Growth, pH, nitrite and  
268 ammonium concentrations were measured after 48 hours. Because our growth medium contains  
269 ammonium as a nitrogen source, we corrected for ammonium assimilated into biomass using  
270 conversion factors based on assumptions about the percentage of nitrogen in biomass and  
271 measurements of optical density (Materials and Methods). This correction has only a minor impact  
272 on the relative ranking of carbon sources in terms of ammonium production, but for some carbon

273 sources our estimates suggest that more ammonium was consumed than produced by the microbial  
274 community (Figure 2).

275 We were primarily interested in identifying carbon sources that influence the end-products  
276 of nitrate respiration because they are specifically utilized by microbial sub-populations with  
277 different respiratory pathways. As such, we were concerned that (1) ammonium might be released  
278 from some nitrogen containing carbon sources, (2) low pH toxicity might select against some  
279 strains, or (3) optical density measurements used to estimate ammonium assimilated into biomass  
280 might be skewed by compound precipitation. Thus, we excluded from further analysis those  
281 carbon sources that (1) contain a nitrogen atom that can be released through microbial catabolism,  
282 (2) lead to a  $\text{pH} < 5$  after 48 hours of growth, or (3) resulted in a measurable optical density in the  
283 absence of microbial growth. In general, the carbon sources we excluded based on these criteria  
284 produced a similar range of ammonium concentrations as those we pursued in more depth (Table  
285 S1), but we expect them to have indirect effects on ammonium production and community  
286 composition aside from selecting for strains with distinct carbon catabolic and nitrate respiratory  
287 pathways. For example, in cultures amended with some amino acids and nucleotides, ammonium  
288 production was higher than was possible via reduction of the 20 mM nitrate in our growth medium  
289 alone. This is likely because ammonium is released via catabolic deamination of these nitrogen-  
290 containing carbon sources. Thus, to avoid this complicating activity, we focused on a subset of 48  
291 carbon sources including organic acids, alcohols and sugars for further analysis (Figure 2).

292 We compared the ammonium concentrations in cultures grown on different carbon sources  
293 and identified carbon sources with a consistent influence on ammonium production within a single  
294 enrichment (Figure 2A) and between enrichments (Figure 2B). For example, L-sorbose  
295 reproducibly drives less ammonium production compared to D-glucose across replicates in the

296 Jewel Lake (JL) enrichment (Figure 2A). A similar result was observed for the other two  
297 enrichments (Figure 2B, Supplemental Table S1).

298         There is no obvious relationship between the chemical class of carbon source and  
299 ammonium production, as both organic acids and sugars are distributed across the range of  
300 ammonium concentrations we observed (Figure 2A). Because all carbon sources were added at a  
301 concentration of 20 mM, this represents an electron equivalent excess of donor relative to acceptor  
302 (20 mM nitrate) in nearly every case regardless of whether we consider the 5 electron reduction of  
303 nitrate to dinitrogen or 8 electron reduction of nitrate to ammonium. Thus, we expect that these  
304 growth conditions should tend to favor DNRA<sup>3-7</sup>. As such, the clear difference in ammonium  
305 production between carbon sources with similar electron donor equivalencies demonstrates a  
306 selective influence of the carbon source on nitrate reduction end-products rather than an influence  
307 of carbon to nitrate ratio. For example, both D-glucose and L-sorbose provide 24 electron  
308 equivalents per mole, but D-glucose consistently led to more ammonium production (Figure 2).

### 309 **Microbial community compositional shifts associated with different end-products of nitrate** 310 **respiration**

311         We hypothesized that the difference in ammonium production between enrichment cultures  
312 recovered on different carbon sources could be attributed to differences in the composition and  
313 gene content of the nitrate-respiring microbial communities selectively enriched on each carbon  
314 source. To understand the relationship between ammonium production and microbial community  
315 composition, we cultured the JL enrichment in triplicate on 10 carbon sources that produced  
316 varying levels of ammonium (open symbols in Figure 2A) and measured pH, optical density,  
317 nitrite, ammonium and microbial community composition by 16S rDNA amplicon sequencing.

318 We measured correlations between ammonium, nitrite, optical density and pH across the  
319 enrichment cultures (Figure 3A,3B). Nitrite and ammonium concentrations are negatively  
320 correlated with each other across cultures (Pearson's correlation  $r = -0.58$ ,  $p = 0.00072$ ) (Figure 3A,  
321 3B). Also, higher nitrite concentrations are associated with lower growth (Figure 3B). This is  
322 consistent with the fact that nitrate reduction to nitrite yields less energy than nitrate reduction to  
323 ammonium or dinitrogen.

324 The electron donor equivalents per mole provided by this set of 10 carbon sources varies  
325 from 6 electrons for formate to 44 electrons for trehalose. Thus, in most cases there is an electron  
326 equivalent excess of carbon relative to nitrate ( $\text{NO}_3^-$  to  $\text{N}_2$  is 5 electrons,  $\text{NO}_3^-$  to  $\text{NH}_4^+$  is 8  
327 electrons). We observed poor correlations between electron donor equivalents and ammonium or  
328 nitrite concentrations (Figure S1A, S1B). We also observed poor correlations between pH and  
329 ammonium or nitrite concentrations (Figure S1C, S1D). However, lower pH is associated with  
330 more growth which is consistent with organic acid production through fermentation of the sugars  
331 (Figure 3B). It is known that fermentation can compete with nitrate respiration to influence nitrate  
332 respiratory end-products(5, 50), but in our enrichments this is not a dominant factor.

333 To understand the mechanistic basis for these correlations we obtained pure cultures and  
334 sequenced the genomes of several dominant 16S rDNA exact sequence variant (ESVs) by plating  
335 the JL enrichment on anaerobic agar plates amended with carbon sources and nitrate. We also  
336 sequenced metagenomes of carbon-source enrichments that were dominated by ESVs that we did  
337 not isolate. We matched each 16S rDNA exact sequence variant (ESV) with 16S rDNA sequences  
338 in genome sequenced isolates. For ESVs we did not isolate, we matched the SILVA(42) taxonomy  
339 of ESVs with the GTDB-Tk(41) taxonomy of the most closely related metagenome assembled  
340 genome (MAG) with the highest fold coverage. For these metagenomes from low complexity

341 enrichments, there is no ambiguity about which MAG corresponds to which 16S ESV. Thus, we  
342 are able to track the abundance of specific strains in the JL enrichment with known genetic  
343 potential across cultures using 16S rDNA amplicons.

344 We observed specific strains enriched on different carbon sources (Figure 3C, Figures S2).  
345 This is consistent with our hypothesis that selective carbon sources alter the composition of the  
346 microbial community and thereby influence nitrite and ammonium production. We focused on  
347 strains that are present at >5% relative abundance in any of the enrichment cultures and measured  
348 correlations between these strains (Figure 3D). The *Escherichia* and *Klebsiella* strains are  
349 strongly negatively correlated with each other (Figure 3D). The *Escherichia* strain is dominant in  
350 D-glucose, D-fructose and D-trehalose while the *Klebsiella* is dominant in L-sorbose and D-  
351 cellobiose (Figure 3C). The two *Citrobacter* strains are co-enriched on D,L-lactate and glycerol,  
352 while *Pseudomonas* and *Sulfurospirillum* are co-enriched on citrate and formate. *Clostridium* and  
353 *Peptostreptococcaceae* are below 5% relative abundance in most samples, but are more abundant  
354 in the primary yeast extract enrichment, likely because they are specialists in peptide and amino  
355 acid catabolism (Figure 3C, Table S3).

### 356 **Correlations between microbial community genetic functional potential and functional** 357 **activity**

358 We identified correlations between the relative abundances of the dominant strains and pH,  
359 OD 600, nitrite or ammonium (Figure 4A). From the metagenomic and isolate genome  
360 sequencing we know the genetic potential of all dominant strains (Figure 4B, Table S2-S4). In  
361 most cases, the strains that are positively correlated with ammonium production or nitrite  
362 production have the genetic potential to carry out that function (Figure 4A, Figure 4B Table S2-  
363 S3). For example, the *Escherichia* strain, whose abundance is positively correlated with



364 ammonium production across our enrichments (Pearson correlation,  $r = 0.77$ ,  $p < 0.0001$ ), has the  
365 complete pathway for DNRA. In contrast, the *Klebsiella* strain, which is positively correlated with  
366 nitrite accumulation (Figure 4A), has a NarG-type nitrate reductase, but no downstream enzymes  
367 involved in DNRA or denitrification and is thus predicted to be a nitrite accumulator (Figure 4B).  
368 The *Sulfurospirillum*, *Pseudomonas* and *Citrobacter* strains are weakly positively correlated with  
369 ammonium production, and, with the exception of the *Pseudomonas*, all have the capacity for  
370 nitrate ammonification. The only strain with a complete denitrification pathway is the  
371 *Pseudomonas*, but the *Sulfurospirillum* has a nitrous oxide reductase (*nosZ*) and thus may  
372 participate in the final step of denitrification as well as DNRA.

373 For each culture for which we have community composition data from 16S rDNA  
374 amplicons, we can sum the relative abundance of all strains possessing the genetic potential for  
375 nitrate reduction, DNRA or denitrification to estimate the total genetic potential for each of these  
376 nitrate respiratory traits. We observe that the genetic potential for DNRA is positively correlated  
377 with ammonium production and negatively correlated with nitrite production (Figure 4C, Figure  
378 4D). This is largely driven by changes in the relative abundance of the dominant nitrate  
379 ammonifying *Escherichia* relative to the nitrite accumulating *Klebsiella*, but the *Citrobacter* and  
380 *Sulfurospillum* strains also contribute to DNRA genetic potential (Table S2).

### 381 **Specific carbon sources influence nitrate respiration end-products by selectively enriching** 382 **for microbial sub-populations with distinct functional traits**

383 To understand the basis for the selective enrichment of specific strains on different carbon  
384 sources, we profiled the carbon utilization capability of several isolates derived from the Jewel  
385 Lake enrichment culture. The highest fold-enrichment of strains relative to the dominant  
386 *Escherichia sp.* JL983 is for carbon sources that the enriched strains are uniquely capable of

387 utilizing (Figure 5A). For example, *Klebsiella sp.* JL973 is the only isolated strain able to grow  
388 on L-sorbose or D-cellobiose and this strain is therefore highly enriched on these substrates.  
389 Similarly, the *Pseudomonas sp.* JL972 is the only isolated strain able to grow on citrate or formate  
390 and is likewise enriched on these substrates (Figure 5A).

391 To confirm the functional traits of the strains in the JL enrichment and demonstrate the  
392 selectivity of different carbon sources in influencing community functional outcomes, we  
393 bioaugmented the Jewel Lake enrichment with the *Klebsiella sp.* JL973 or *Pseudomonas sp.* JL972  
394 strains at a 1:1 ratio of isolate to enrichment (Figure 5B). As expected, bioaugmentation with the  
395 *Klebsiella* strain shifts end-products towards more nitrite production and less ammonium  
396 production on D-glucose. There is no influence of *Klebsiella sp.* JL973 bioaugmentation on nitrate  
397 reduction end-products in L-sorbose cultures because *Klebsiella sp.* JL973 is already dominant on  
398 this carbon source and nitrate is stoichiometrically converted to nitrite.

399 There was no influence of *Klebsiella sp.* JL973 bioaugmentation in citrate cultures, because  
400 the *Klebsiella* strain does not utilize citrate. In contrast, *Pseudomonas* bioaugmentation in D-  
401 glucose and citrate cultures shifts end-products towards lower nitrite and ammonium production.  
402 This is consistent with the *Pseudomonas* strain's capacity for complete denitrification and  
403 utilization of these carbon sources. While difficult to predict based on gene content, citrate  
404 utilization is heterogeneously distributed within the Enterobacteriaceae(13, 14), and anaerobic  
405 oxidation of citrate to formate by *Enterobacterial* isolates is generally not coupled to growth(51).  
406 In contrast, *Pseudomonas* and *Sulfurospirillum* are generally capable of utilizing citrate  
407 anaerobically coupled to nitrate reduction(52).

408 We also looked for the presence of L-sorbose utilization genes (*sorABE*) in the genomes  
409 of organisms predicted to be denitrifiers, nitrate ammonifiers or nitrite accumulators based on the

410 presence or absence of nitrate reductase (*narG*, *napA*) and nitrite reductase (*nirS*, *nirK*, *nrfA*) genes  
411 (Figure 5C). The function of the *sorABE* genes has mostly been studied in the Enterobacteriaceae  
412 (49), and there may be other catabolic pathways for L-sorbose. However, a roughly equivalent  
413 number of predicted nitrate ammonifying (DNRA) and nitrite accumulating Enterobacteriaceae  
414 have *sorABE*. Thus, the enrichment of Enterobacterial nitrite accumulators, such as *Klebsiella* sp.  
415 JL973, may be a likely outcome after L-sorbose amendment in terrestrial environments. Taken  
416 together, our results demonstrate a selective influence of carbon sources in altering nitrate  
417 reduction end-products in the Jewel Lake enrichment by enriching for strains with specific carbon  
418 catabolic and nitrate respiratory traits.

419

## 420 **Discussion**

421 A predictive understanding of how environmental perturbations influence the microbially-  
422 mediated nitrogen cycle has major implications for sustainable agriculture, wastewater treatment,  
423 and toxin remediation(1, 2). Previous work has demonstrated linkages between changes in carbon  
424 composition and microbial community composition(21-24), carbon composition and respiratory  
425 end-products(5, 10, 53), or community composition and respiratory end-products(6). However,  
426 few studies to date have examined the dynamics of nitrate respiring microbial communities using  
427 metagenomic sequencing (6), and rarely are the dynamics of genes, strains and respiratory traits  
428 systematically linked in a high-throughput format as we have in this study. A high-resolution  
429 understanding of how specific substrates impact the interactions and respiratory potential of  
430 specific microorganisms remains elusive, but will ultimately be required to model and predict the  
431 behavior of microbial communities and their ecosystem functions.

432 To overcome these challenges, in this study we applied a high-throughput approach to link  
433 diverse carbon sources to functional activity, community composition and genetic potential in  
434 nitrate-respiring microbial enrichment cultures. We found that specific carbon sources favor  
435 different end-products of nitrate respiration across three different microbial communities from  
436 geographically and geochemically distinct environments (Figure 2). To understand the  
437 mechanistic basis for these findings we sequenced the genomes of all dominant strains in an  
438 enrichment culture from aquatic sediment and identified correlations between dominant strains  
439 with different respiratory traits and the end-products of nitrate reduction (Figure 4). For example,  
440 the nitrate ammonifier, *Escherichia sp.* JL983 dominates on many sugars, but the nitrite  
441 accumulator, *Klebsiella sp.* JL973, is specifically enriched on L-sorbose and D-cellobiose and  
442 correlated with high nitrite concentrations and low ammonium concentrations. D,L-lactate,  
443 pyruvate and glycerol enrich for nitrate ammonifying *Citrobacter sp.* JL976 and *Citrobacter sp.*  
444 JL978. On citrate or formate, denitrifying *Pseudomonas sp.* JL972 are enriched, though not to  
445 the same extent as the nitrate ammonifying *Sulfurospirillum sp.* bin18 (Figure 3).

446 Carbon concentration is widely recognized as an important control on the competition  
447 between DNRA and denitrification(3, 6, 7, 11), but our results add important nuance to this  
448 paradigm. In our experiments, all cultures were amended with high concentrations of carbon  
449 relative to nitrate, and while nitrate ammonifiers were enriched in many cultures with  
450 correspondingly high ammonium production, nitrite accumulators or denitrifiers were enriched on  
451 other carbon sources with lower ammonium production and higher nitrite accumulation. We  
452 conclude that, while the thermodynamic advantage of DNRA is important, high local  
453 concentrations of a single carbon source can enrich for non-DNRA microorganisms until low-  
454 abundance nitrate ammonifiers capable of using that carbon source can grow to an extent where

455 they can exert a dominant influence on the end-products of nitrate respiration. Therefore, accurate  
456 prediction of the end-products of nitrate respiration requires knowing the carbon concentration,  
457 carbon composition as well as the relative abundances, carbon catabolic traits and nitrate  
458 respiratory traits of each member of the microbial community.

459 We postulate that given the uneven distribution of catabolic and respiratory pathways in  
460 microbial genomes, different carbon sources will selectively favor different respiratory end-  
461 products by enriching for microbial sub-populations with different carbon catabolic traits. It is  
462 likely that selective carbon source amendments will be more effective in shifting respiratory end-  
463 products in less complex microbial communities with less dispersal, such as our enrichments or  
464 industrial reactors, versus open environments like aquifers, agricultural soils or lake sediment.  
465 However, in any environment, specific carbon source amendments will, at least transiently, enrich  
466 for distinct sub-populations with distinct respiratory traits. Thus, we anticipate that high-  
467 throughput approaches may help identify prebiotic amendments that can influence nitrate  
468 respiratory end-products in industrial ecosystems, for example, to stimulate denitrification in  
469 wastewater treatment facilities or to stimulate DNRA in agricultural soils.

470 More broadly, correctly predicting the influence of diverse selective pressures on complex  
471 microbial communities with heterogeneous gene content and traits will require better functional  
472 annotations for genes and strains. While genome-resolved metagenomics provides high-resolution  
473 snapshots of microbial communities, high-throughput laboratory simulations are essential to  
474 understand how changing conditions influence community dynamics. There is much to be gained  
475 by combining these two approaches as we have in this study. By studying the dynamics and  
476 function of genomically-characterized, low-complexity microbial communities in high-  
477 throughput, we anticipate rapid advances in mechanistic ecology that will improve our ability to

478 accurately predict the influence of complex, variable environmental parameters on microbially-  
479 mediated processes.

480

481

482

483

484

485

486

487

#### 488 **Figure Legends.**

489 **Figure 1. Workflow to measure the influence of selective growth conditions on microbial**  
490 **community composition, gene content and functional activity.** **A.** Archived microbial  
491 enrichment cultures are cultured under different growth conditions. Community functional traits,  
492 community composition and both strain and community genetic potential are measured. In the  
493 present work, freshwater nitrate reducing microbial communities are grown on 94 different carbon  
494 sources, some of which are selective for different end-products or intermediates of nitrate  
495 reduction. Growth (optical density/OD 600), nitrite and ammonium are measured through  
496 colorimetric assays, and microbial community composition is determined using 16S rDNA  
497 amplicon sequencing. **B.** Pure culture microbial isolates, isolate genomes and metagenome  
498 assembled genomes (MAGs) are obtained for select cultures. Matches between 16S rDNA  
499 sequences in genomes and MAGS with amplicons allows the assignment of genetic potential to  
500 the 16S rDNA exact sequence variants (ESVs) in all of the enrichment cultures.

501 **Figure 2. Influence of selective carbon sources on ammonium production in enrichment**  
502 **cultures. A.** Ammonium production (mM) of the Jewel Lake enrichment cultured on 48 diverse  
503 sugars, organic acids and alcohols. Symbols represent means and error bars represent the standard  
504 deviation of four replicates. Orange, open symbols are carbon sources selected for further 16S  
505 microbial community analysis, isolations and metagenomics. **B.** Mean ammonium produced  
506 (mM) by cultures cultured on the 48 diverse carbon sources (shown in panel A) compared between  
507 the Jewel Lake enrichment and the Russell Ranch (closed symbols) or Oak Ridge Field Research  
508 Center enrichments (open symbols).

509 **Figure 3. Correlations between activity measurements and between strain abundances in the**  
510 **Jewel Lake enrichment. A.** Ammonium and nitrite concentrations for the Jewel Lake  
511 enrichment cultured on 10 different carbon sources in triplicate. Points are colored based on which  
512 dominant strain is most highly selectively enriched in each condition (see panel C legend).  
513 Dominant strains are 16S rDNA exact sequence variants (ESVs/strains) observed at a relative  
514 abundance of greater than 5% in any culture. Linear fit (Pearson correlation) of the nitrite and  
515 ammonium data is displayed (grey line) as well as the estimated 95% confidence interval (light  
516 grey shading) and linear correlation using Pearson's  $r$  (legend). **B.** Pearson correlations between  
517 functional activity measurements for the Jewel Lake enrichment cultured on the same 10 carbon  
518 sources from panel A. Significant correlations, where  $p < 0.05$  and Benjamini–Hochberg false  
519 discovery rate (FDR)  $q$  values were  $<0.1$ , are indicated by bold borders. **C.** Relative abundances  
520 of strains in the Jewel Lake enrichment cultured on different carbon sources. Coloring as in Panel  
521 A. **D.** Pearson correlations between the relative abundances of strains in the Jewel Lake  
522 enrichment. Significant correlations, after FDR correction, are indicated by bold borders.

523 **Figure 4. Correlations between strain abundance or total genetic potential with activity**  
524 **measurements in the Jewel Lake enrichment. A.** Pearson correlations between strain relative  
525 abundances and measurements of nitrite, ammonium, pH, and OD 600. Significant correlations,  
526 after FDR correction, are indicated by bold borders. **B.** The predicted genetic potential of each  
527 strain in the Jewel Lake enrichment to catalyze steps in nitrate reduction, DNRA and  
528 denitrification. Coloring as in Figure 3C. **C.** Relative abundances of the total genetic potential  
529 for nitrate reduction, DNRA, or denitrification reduction plotted against ammonium  
530 concentrations. Each point represents a different culture. Genetic potential for each trait is the  
531 presence of genes essential for each trait. Total genetic potential is the sum of the relative  
532 abundances of each strain with each trait. **D.** Pearson correlations between the relative abundances  
533 of the genetic potential for DNRA, denitrification or nitrate reduction and the measurements of  
534 nitrite, ammonium, pH, and OD 600. Significant correlations, after FDR correction, are indicated  
535 by bold borders.

536 **Figure 5. Selective carbon sources enrich for strains with distinct functional traits. A.** Fold  
537 enrichment of strains relative to *Escherichia* in the Jewel Lake enrichment. Open symbols are  
538 strains that use carbon sources the *Escherichia* cannot utilize. **B.** Nitrite and ammonium  
539 concentrations of the Jewel Lake enrichment alone (dark grey symbols) or bioaugmented with  
540 *Klebsiella* (orange symbols) or *Pseudomonas* (blue symbols) with D-glucose, citrate or L-sorbose  
541 as the sole carbon source. **C.** For genomes that encode the L-sorbose utilization genes (*sorABE*),  
542 we show how often they are expected to be nitrite accumulators or nitrate ammonifiers (DNRA)  
543 based on the presence or absence of respiratory nitrate reductase genes (*napA*, *narG*) and  
544 respiratory nitrite reductase genes (*nirS*, *nirK*, *nrfA*). Because L-sorbose utilization is best studied  
545 in Enterobacteriaceae, we show results separately for this group than for other prokaryotes (Other).



546 We found no predicted denitrifiers that have the *sorABE* genes. Data is from 27,941 prokaryotic  
547 genomes on Annotree (Materials and Methods).

548

549

550 **Acknowledgements**

551 This work was funded by ENIGMA, a Scientific Focus Area Program supported by the U. S.  
552 Department of Energy, Office of Science, Office of Biological and Environmental Research,  
553 Genomics: GTL Foundational Science through contract DE-AC02-05CH11231 between  
554 Lawrence Berkeley National Laboratory and the U. S. Department of Energy. The authors would  
555 like to thank members of the ENIGMA Scientific Focus Area as well as John D. Coates (UC.  
556 Berkeley), Tyler C. Barnum (UC Berkeley) and David C. Vuono (Colorado School of Mines) for  
557 helpful feedback and suggestions.

558 **Data Availability**

559 DNA sequencing data are available under BioProject Accession PRJNA576510.

560

561

562

563 **Supplemental materials**

564 **Figure S1.** **A.** Nitrite concentrations and donor electron equivalents for the Jewel Lake  
565 enrichment recovered on 10 different carbon sources in triplicate. **B.** Nitrite concentrations and  
566 donor electron equivalents for the Jewel Lake enrichment recovered on 10 different carbon sources  
567 in triplicate. **C.** Ammonium concentrations and pH for the Jewel Lake enrichment recovered on  
568 10 different carbon sources in triplicate. **D.** Ammonium concentrations and pH for the Jewel Lake  
569 enrichment recovered on 10 different carbon sources in triplicate. Points are colored based on  
570 which dominant strain is most highly selectively enriched in each condition.

571 **Figure S2.** Ammonium (A-E) or nitrite concentrations in the Jewel Lake enrichment recovered  
572 on different carbon sources plotted against relative abundances of *Escherichia* and *Klebsiella* (A),  
573 *Citrobacter* (B), *Pseudomonas* and *Sulfurospirillum* (C), or *Clostridium* and  
574 *Peptostreptococcaceae* (D) strains.

575

576 **Dataset S1**

577 **Table S1.** Carbon source influence on the end-products of nitrate reduction in enrichment cultures.

578 **Table S2.** Taxonomy and genetic functional potential of strains in Jewel Lake enrichment culture

579 **Table S3.** Functional activity and community composition of Jewel Lake enrichment recovered  
580 on various carbon sources.

581 **Table S4.** MetaBat2 and CheckM results and nitrogen cycling genes for metagenome assembled  
582 genomes from Jewel Lake enrichment

583

584

585 **References**

586

587

- 588 1. N. Gruber, J. N. Galloway, An Earth-system perspective of the global nitrogen cycle.  
589 *Nature*. **451**, 293–296 (2008).
- 590 2. W. Perry, A. Broers, F. El-Baz, W. Harris, B. Healy, *Grand challenges for engineering*  
591 (National Academy of Engineering, Washington, DC, 2017).
- 592 3. S. Yoon, C. Cruz-García, R. Sanford, K. M. Ritalahti, F. E. Löffler, Denitrification versus  
593 respiratory ammonification: environmental controls of two competing dissimilatory NO<sub>3</sub><sup>-</sup>  
594 NO<sub>2</sub><sup>-</sup> reduction pathways in *Shewanella loihica* strain PV-4. *The ISME Journal*. **9**, 1093–  
595 1104 (2015).
- 596 4. E. M. van den Berg, M. Boleij, J. G. Kuenen, R. Kleerebezem, M. C. M. van Loosdrecht,  
597 DNRA and Denitrification Coexist over a Broad Range of Acetate/N- NO<sub>3</sub><sup>-</sup> Ratios, in a  
598 Chemostat Enrichment Culture. *Front. Microbio.* **7**, 527 (2016).
- 599 5. E. M. van den Berg, M. P. Elisário, J. G. Kuenen, R. Kleerebezem, M. C. M. van  
600 Loosdrecht, Fermentative Bacteria Influence the Competition between Denitrifiers and  
601 DNRA Bacteria. *Front. Microbio.* **8**, 1303–13 (2017).
- 602 6. B. Kraft *et al.*, Nitrogen cycling. The environmental controls that govern the end product  
603 of bacterial nitrate respiration. *Science*. **345**, 676–679 (2014).
- 604 7. J. M. Tiedje, A. J. Sexstone, D. D. Myrold, J. A. Robinson, Denitrification: ecological  
605 niches, competition and survival. *Antonie van Leeuwenhoek*. **48**, 569–583 (1982).
- 606 8. A. E. Tugtas, S. G. Pavlostathis, Electron donor effect on nitrate reduction pathway and  
607 kinetics in a mixed methanogenic culture. *Biotechnol. Bioeng.* **98**, 756–763 (2007).
- 608 9. J. C. Akunna, C. Bizeau, R. Moletta, Nitrate and nitrite reductions with anaerobic sludge  
609 using various carbon sources: Glucose, glycerol, acetic acid, lactic acid and methanol.  
610 *Water Research*. **27**, 1303–1312 (1993).
- 611 10. B. Kelso, R. V. Smith, R. J. Laughlin, S. D. Lennox, Dissimilatory nitrate reduction in  
612 anaerobic sediments leading to river nitrite accumulation. *Applied and Environmental*  
613 *Microbiology*. **63**, 4679–4685 (1997).
- 614 11. D. C. Vuono *et al.*, Resource Concentration Modulates the Fate of Dissimilated Nitrogen  
615 in a Dual-Pathway Actinobacterium. *Front. Microbio.* **10**, 175 (2019).
- 616 12. M. B. Nelson, A. C. Martiny, J. B. H. Martiny, Global biogeography of microbial  
617 nitrogen-cycling traits in soil. *Proc. Natl. Acad. Sci. U.S.A.* **113**, 8033–8040 (2016).

- 618 13. S. Octavia, R. Lan, in *The Prokaryotes*, E. Rosenburg, E. F. Delong, S. Lory, E.  
619 Stackebrandt, F. Thompson, Eds. (Springer New York, New York, NY, 2006).
- 620 14. G. M. Garrity, J. T. Staley, D. R. Boone, P. De Vos, Eds., *Bergey's Manual of Systematic*  
621 *Bacteriology: Volume two: The Proteobacteria* (Springer New York, 2006).
- 622 15. K. Zhalnina *et al.*, Dynamic root exudate chemistry and microbial substrate preferences  
623 drive patterns in rhizosphere microbial community assembly. *Nature Microbiology*. **3**,  
624 470–480 (2018).
- 625 16. D. B. Watson *et al.*, In situ bioremediation of uranium with emulsified vegetable oil as the  
626 electron donor. *Environ. Sci. Technol.* **47**, 6440–6448 (2013).
- 627 17. B. Li *et al.*, Bacterial Community Shift and Coexisting/Coexcluding Patterns Revealed by  
628 Network Analysis in a Uranium-Contaminated Site after Bioreduction Followed by  
629 Reoxidation. *Applied and Environmental Microbiology*. **84**, e02885–17 (2018).
- 630 18. K. H. Williams *et al.*, Acetate Availability and its Influence on Sustainable  
631 Bioremediation of Uranium-Contaminated Groundwater. *Geomicrobiology Journal*. **28**,  
632 519–539 (2011).
- 633 19. K. H. Williams, J. R. Bargar, J. R. Lloyd, D. R. Lovley, Bioremediation of uranium-  
634 contaminated groundwater: a systems approach to subsurface biogeochemistry. *Current*  
635 *Opinion in Biotechnology*. **24**, 489–497 (2013).
- 636 20. C. A. Sandefur, S. S. Koenigsberg, The Use of Hydrogen Release Compound for the  
637 Accelerated Bioremediation of Anaerobically Degradable Contaminants: The Advent of  
638 Time-Release Electron Donors. *Remediation Journal*. **10**, 31–53 (1999).
- 639 21. T. M. Flynn *et al.*, Parallelized, Aerobic, Single Carbon-Source Enrichments from  
640 Different Natural Environments Contain Divergent Microbial Communities. *Front.*  
641 *Microbio.* **8**, 1540 (2017).
- 642 22. B. Wawrik, L. Kerkhof, J. Kukor, G. Zylstra, Effect of different carbon sources on  
643 community composition of bacterial enrichments from soil. *Applied and Environmental*  
644 *Microbiology*. **71**, 6776–6783 (2005).
- 645 23. Goldfarb, K. C *et al.*, Differential growth responses of soil bacterial taxa to carbon  
646 substrates of varying chemical recalcitrance, *Front. Microbio.* **2**, 1–10 (2011).
- 647 24. J. E. Goldford *et al.*, Emergent simplicity in microbial community assembly. *Science*. **361**,  
648 469–474 (2018).
- 649 25. M. N. Price *et al.*, Mutant phenotypes for thousands of bacterial genes of unknown  
650 function. *Nature*. **557**, 503–509 (2018).

- 651 26. H. Carlson, A. Deutschbauer, J. Coates, Microbial metal resistance and metabolism across  
652 dynamic landscapes: high-throughput environmental microbiology. *F1000Res.* **6**, 1026–8  
653 (2017).
- 654 27. H. K. Carlson *et al.*, Monofluorophosphate is a selective inhibitor of respiratory sulfate-  
655 reducing microorganisms. *Environ. Sci. Technol.* **49**, 3727–3736 (2015).
- 656 28. H. K. Carlson *et al.*, Mechanisms of direct inhibition of the respiratory sulfate-reduction  
657 pathway by (per)chlorate and nitrate. *The ISME Journal.* **9**, 1295–1305 (2014).
- 658 29. D. W. Rivett, T. Bell, Abundance determines the functional role of bacterial phylotypes in  
659 complex communities. *Nature Microbiology.* **3**, 767–772 (2018).
- 660 30. G. K. Sims, T. R. Ellsworth, R. L. Mulvaney, Microscale determination of inorganic  
661 nitrogen in water and soil extracts. *Communications in Soil Science and Plant Analysis.*  
662 **26**, 303–316 (2008).
- 663 31. H. K. Carlson *et al.*, The selective pressures on the microbial community in a metal-  
664 contaminated aquifer. *The ISME Journal*, 1–13 (2018).
- 665 32. R. Milo, P. Jorgensen, U. Moran, G. Weber, M. Springer, BioNumbers—the database of  
666 key numbers in molecular and cell biology. *Nucleic Acids Research.* **38**, D750–D753  
667 (2009).
- 668 33. J. Soini, K. Ukkonen, P. Neubauer, High cell density media for *Escherichia coli* are  
669 generally designed for aerobic cultivations – consequences for large-scale bioprocesses  
670 and shake flask cultures. *Microbial Cell Factories.* **7**, 26–11 (2008).
- 671 34. J. Glazyrina *et al.*, High cell density cultivation and recombinant protein production with  
672 *Escherichia coli* in a rocking-motion-type bioreactor. *Microbial Cell Factories.* **9**, 42–11  
673 (2010).
- 674 35. A. C. Redfield, The Biological Control of Chemical Factors in the Environment. *American*  
675 *Scientist.* **46**, 205–221 (1958).
- 676 36. E. A. Paul, *Soil microbiology, ecology and biochemistry* (Academic Press, 2014).
- 677 37. O. S. Venturelli *et al.*, Deciphering microbial interactions in synthetic human gut  
678 microbiome communities. *Molecular Systems Biology.* **14**, e8157 (2018).
- 679 38. R. R. Wick, L. M. Judd, C. L. Gorrie, K. E. Holt, Unicycler: Resolving bacterial genome  
680 assemblies from short and long sequencing reads. *PLoS Comput Biol.* **13**, e1005595–22  
681 (2017).
- 682 39. S. Nurk, D. Meleshko, A. Korobeynikov, P. A. Pevzner, metaSPAdes: a new versatile  
683 metagenomic assembler. *Genome Res.* **27**, 824–834 (2017).

- 684 40. D. D. Kang *et al.*, MetaBAT 2: an adaptive binning algorithm for robust and efficient  
685 genome reconstruction from metagenome assemblies. *PeerJ*. **7**, e7359–13 (2019).
- 686 41. D. H. Parks *et al.*, A standardized bacterial taxonomy based on genome phylogeny  
687 substantially revises the tree of life. *Nature Biotechnology*. **36**, 996–1004 (2018).
- 688 42. P. Yilmaz *et al.*, The SILVA and “All-species Living Tree Project (LTP)” taxonomic  
689 frameworks. *Nucleic Acids Research*. **42**, D643–D648 (2013).
- 690 43. D. H. Parks, M. Imelfort, C. T. Skennerton, P. Hugenholtz, G. W. Tyson, CheckM:  
691 assessing the quality of microbial genomes recovered from isolates, single cells, and  
692 metagenomes. *Genome Res*. **25**, 1043–1055 (2015).
- 693 44. R. Overbeek, The Subsystems Approach to Genome Annotation and its Use in the Project  
694 to Annotate 1000 Genomes. *Nucleic Acids Research*. **33**, 5691–5702 (2005).
- 695 45. M. Kanehisa, Y. Sato, M. Kawashima, M. Furumichi, M. Tanabe, KEGG as a reference  
696 resource for gene and protein annotation. *Nucleic Acids Research*. **44**, D457–D462 (2016).
- 697 46. L. Fu, B. Niu, Z. Zhu, S. Wu, W. Li, CD-HIT: accelerated for clustering the next-  
698 generation sequencing data. *Bioinformatics*. **28**, 3150–3152 (2012).
- 699 47. B. Buchfink, C. Xie, D. H. Huson, Fast and sensitive protein alignment using DIAMOND.  
700 *Nat Meth*. **12**, 59–60 (2015).
- 701 48. K. Mandler *et al.*, AnnoTree: visualization and exploration of a functionally annotated  
702 microbial tree of life. *Nucleic Acids Research*. **47**, 4442–4448 (2019).
- 703 49. G. A. Sprenger, J. W. Lengeler, L-Sorbose metabolism in *Klebsiella pneumoniae* and  
704 Sor+ derivatives of *Escherichia coli* K-12 and chemotaxis toward sorbose. *Journal of*  
705 *Bacteriology*. **157**, 39–45 (1984).
- 706 50. J. W. Paul, E. G. Beauchamp, J. T. Trevors, Acetate, propionate, butyrate, glucose, and  
707 sucrose as carbon sources for denitrifying bacteria in soil. *Can. J. Microbiol.* **35**, 754–759  
708 (1989).
- 709 51. M. Bott, Anaerobic citrate metabolism and its regulation in enterobacteria. *Arch*  
710 *Microbiol.* **167**, 78–88 (1997).
- 711 52. T. Goris, G. Diekert, in *Organohalide-Respiring Bacteria*, L. Adrian, F. E. Löffler, Eds.  
712 (Springer, Berlin, Heidelberg, Berlin, Heidelberg, 2016), vol. 371, pp. 209–234.
- 713 53. B. Rehr, J.-H. Klemme, Competition for nitrate between denitrifying *Pseudomonas*  
714 *stutzeri* and nitrate ammonifying enterobacteria. *FEMS Microbiology Letters*. **62**, 51–57  
715 (1989).

716

**A**

1. Archived  
enrichment  
cultures

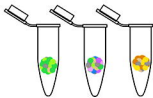

Freshwater nitrate  
reducing microbial  
communities

2. Grow cultures  
under selective  
conditions

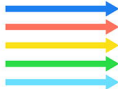

Diverse  
carbon  
sources

3. Measure activity and community composition

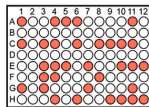

OD<sub>600</sub>

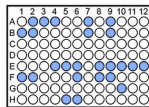

Nitrite

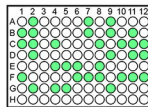

Ammonium

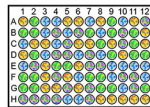

16S rDNA

**B**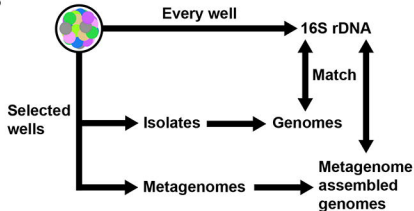



**A**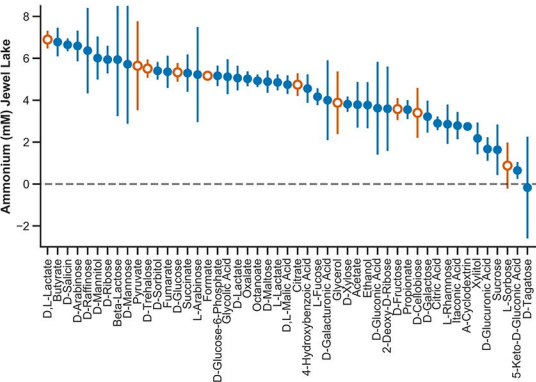**B**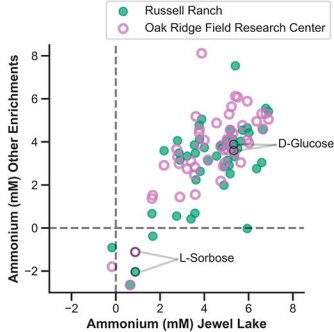

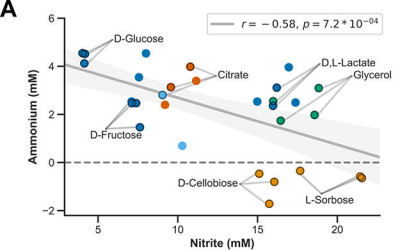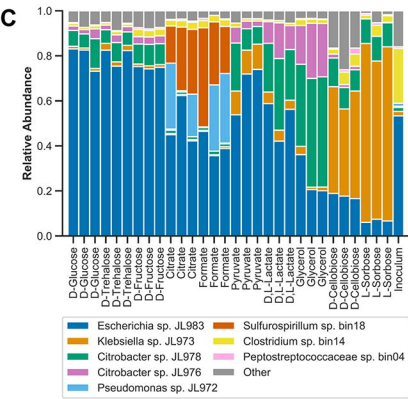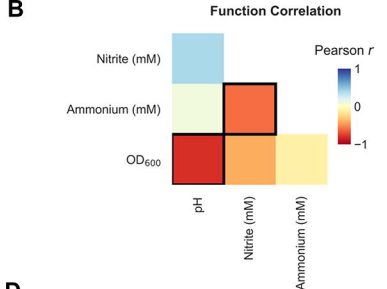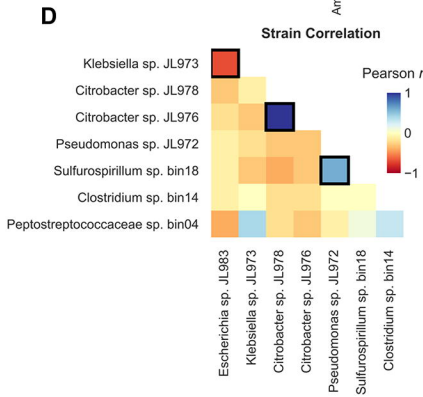

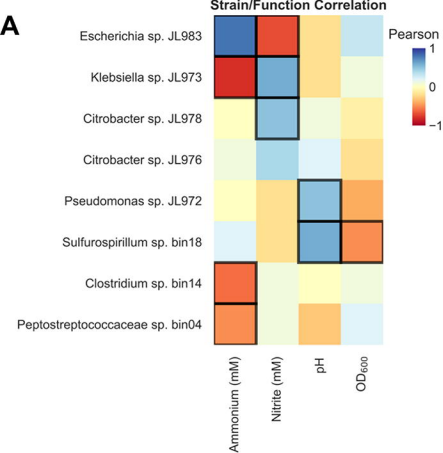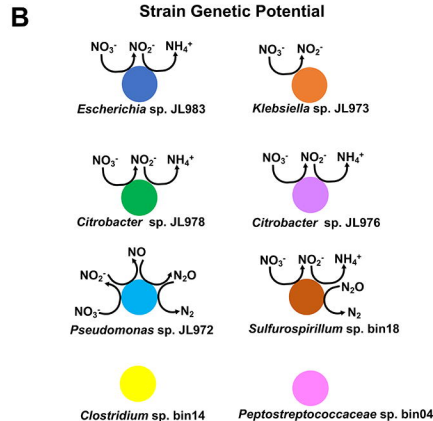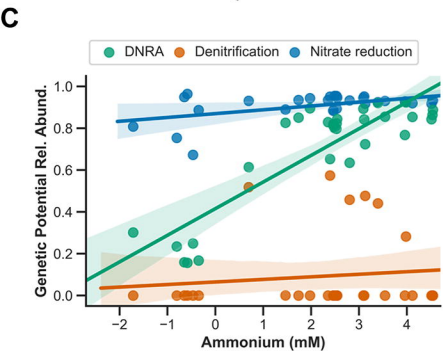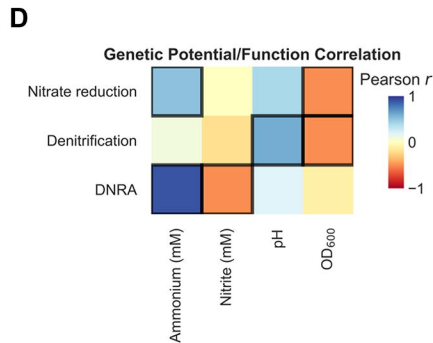

A

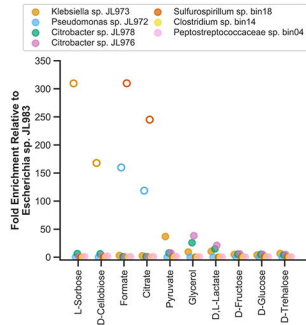

B

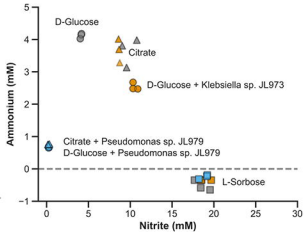

C

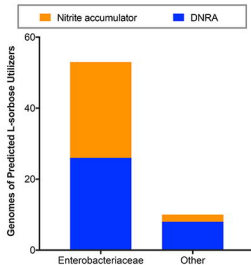

Source: https://www.biorxiv.org/content/10.1101/829143v1.full.pdf
